# Supplementary material for: Role of tumor infiltrating lymphocytes and spatial immune heterogeneity in sensitivity to PD-1 axis blockers in non-small cell lung cancer
Source: PubMed Central journal article supplement — J Immunother Cancer. 2022 Jun 1;10(6):e004440. doi: 10.1136/jitc-2021-004440 (PMC9161072; doi:10.1136/jitc-2021-004440), 2022-06-01
Supplement: jitc-2021-004440supp001.pdf [file jitc-2021-004440supp001.pdf]

## Supplemental tables

| Parameter    | CD4 High<br>No. (%) | CD4 Low<br>No. (%) | P value     | CD8 High No.<br>(%) | CD8 Low No.<br>(%) | P value       | CD20 High<br>No. (%) | CD20 Low<br>No. (%) | P value |
|--------------|---------------------|--------------------|-------------|---------------------|--------------------|---------------|----------------------|---------------------|---------|
| Age, y       |                     |                    |             |                     |                    |               |                      |                     |         |
| <65          | 37 (51.4%)          | 35 (48.6%)         | 0.99        | 36 (50.0%)          | 36 (50.0%)         | 0.74          | 37 (51.4%)           | 35 (48.6%)          | 0.99    |
| ≥65          | 38 (52.1%)          | 35 (47.9%)         |             | 39 (53.4%)          | 34 (46.6%)         |               | 38 (52.1%)           | 35 (47.9%)          |         |
| Sex          |                     |                    |             |                     |                    |               |                      |                     |         |
| Male         | 33 (42.9%)          | 44 (57.1%)         | <b>0.04</b> | 38 (46.8%)          | 41 (53.2%)         | 0.43          | 39 (50.7%)           | 38 (49.3%)          | 0.87    |
| Female       | 49 (60.5%)          | 32 (39.5%)         |             | 44 (54.3%)          | 37 (45.7%)         |               | 43 (53.1%)           | 38 (46.9%)          |         |
| Smoker       |                     |                    |             |                     |                    |               |                      |                     |         |
| No           | 13 (43.3%)          | 17 (56.7%)         | 0.42        | 14 (46.7%)          | 16 (53.3%)         | 0.84          | 15 (50.0%)           | 15 (50.0%)          | 0.84    |
| Yes          | 66 (52.4%)          | 60 (47.6%)         |             | 64 (50.8%)          | 62 (49.2%)         |               | 66 (52.4%)           | 60 (47.6%)          |         |
| Histology    |                     |                    |             |                     |                    |               |                      |                     |         |
| ADC          | 59 (55.7%)          | 47 (44.3%)         | 0.46        | 51 (48.1%)          | 55 (51.9%)         | 0.99          | 60 (56.6%)           | 46 (43.4%)          | 0.09    |
| SCC          | 19 (47.5%)          | 21 (52.5%)         |             | 19 (47.5%)          | 21 (52.5%)         |               | 16 (40.0%)           | 24 (60.0%)          |         |
| Stage        |                     |                    |             |                     |                    |               |                      |                     |         |
| I-II         | 18 (56.3%)          | 14 (43.7%)         | 0.69        | 17 (53.1%)          | 15 (46.9%)         | 0.84          | 17 (53.1%)           | 15 (46.9%)          | 0.85    |
| III-IV       | 63 (50.8%)          | 61 (49.2%)         |             | 62 (50.0%)          | 62 (50.0%)         |               | 63 (50.8%)           | 61 (49.2%)          |         |
| PD-L1 Status |                     |                    |             |                     |                    |               |                      |                     |         |
| PD-L1<1%     | 23 (39.7%)          | 35 (60.3%)         | <b>0.05</b> | 20 (34.5%)          | 38 (65.5%)         | <b>0.0026</b> | 28 (48.3%)           | 30 (51.7%)          | 0.86    |
| PD-L1≥1%     | 42 (58.3%)          | 30 (41.7%)         |             | 45 (62.5%)          | 27 (37.5%)         |               | 37 (51.4%)           | 35 (48.6%)          |         |

**Table S1.** Association between TILs density and clinicopathological variables.

| Variable     | Stratification | #Cases TCR Burden Cohort |
|--------------|----------------|--------------------------|
| Age          | <65            | 99 (51.6%)               |
|              | ≥65            | 93 (48.4%)               |
| Gender       | Male           | 87 (45.3%)               |
|              | Female         | 105 (54.7%)              |
| Smoking      | Smoker         | 167 (87.0%)              |
|              | Non-Smoker     | 25 (13.0%)               |
| Stage        | I-II           | 23 (13.1%)               |
|              | III-IV         | 152 (86.9%)              |
| Histology    | Adenocarcinoma | 149 (77.6%)              |
|              | Squamous       | 30 (15.6%)               |
|              | Other          | 13 (6.8%)                |
| PD-L1 Status | PD-L1<1%       | 79 (41.1%)               |
|              | PD-L1≥1%       | 113 (58.9%)              |
| Treatment    | Nivolumab      | 95 (49.5%)               |
|              | Pembrolizumab  | 91 (47.4%)               |
|              | Atezolizumab   | 6 (3.1%)                 |

**Table S2.** Clinicopathological description of TCR burden cohort

| Parameter           | TIM-3           |                      | P value       | PD-1            |                | P value | LAG-3           |                | P value |
|---------------------|-----------------|----------------------|---------------|-----------------|----------------|---------|-----------------|----------------|---------|
|                     | High<br>No. (%) | TIM-3 Low<br>No. (%) |               | High<br>No. (%) | Low<br>No. (%) |         | High<br>No. (%) | Low<br>No. (%) |         |
| <b>Age, y</b>       |                 |                      |               |                 |                |         |                 |                |         |
| <65                 | 43 (53.1%)      | 38 (46.9%)           | 0.53          | 45 (55.6%)      | 36 (44.4%)     | 0.76    | 42 (51.8%)      | 39 (48.2%)     | 0.88    |
| ≥65                 | 40 (47.6%)      | 44 (52.4%)           |               | 44 (52.4%)      | 40 (47.6%)     |         | 42 (50.0%)      | 42 (50.0%)     |         |
| <b>Sex</b>          |                 |                      |               |                 |                |         |                 |                |         |
| Male                | 47 (56.0%)      | 37 (44.0%)           | 0.10          | 42 (50.0%)      | 42 (50.0%)     | 0.45    | 42 (50.0%)      | 42 (50.0%)     | 0.88    |
| Female              | 39 (57.1%)      | 52 (42.9%)           |               | 51 (56.0%)      | 40 (44.0%)     |         | 44 (48.4%)      | 47 (51.6%)     |         |
| <b>Smoker</b>       |                 |                      |               |                 |                |         |                 |                |         |
| No                  | 18 (50.0%)      | 18 (50.0%)           | 0.99          | 18<br>(50.0%)   | 18 (50.0%)     | 0.71    | 23 (63.9%)      | 13 (36.1%)     | 0.06    |
| Yes                 | 68 (49.3%)      | 70 (50.7%)           |               | 74 (53.6%)      | 64 (46.4%)     |         | 62 (44.9%)      | 76 (55.1%)     |         |
| <b>Histology</b>    |                 |                      |               |                 |                |         |                 |                |         |
| ADC                 | 59 (49.2%)      | 61 (50.8%)           | 0.59          | 68 (56.7%)      | 52 (43.3%)     | 0.21    | 60 (50.0%)      | 60 (50.0%)     | 0.21    |
| SCC                 | 23 (54.8%)      | 19 (45.2%)           |               | 19 (45.2%)      | 23 (54.8%)     |         | 16 (38.1%)      | 26 (61.9%)     |         |
| <b>Stage</b>        |                 |                      |               |                 |                |         |                 |                |         |
| I-II                | 16 (54.3%)      | 19 (45.7%)           | 0.71          | 17 (48.6%)      | 18 (51.4%)     | 0.45    | 14 (40.0%)      | 21 (60.0%)     | 0.70    |
| III-IV              | 69 (50.0%)      | 69 (50.0%)           |               | 78 (56.5%)      | 60 (43.5%)     |         | 62 (44.9%)      | 76 (55.1%)     |         |
| <b>PD-L1 Status</b> |                 |                      |               |                 |                |         |                 |                |         |
| PD-L1<1%            | 25 (34.7%)      | 47 (65.3%)           | <b>0.0007</b> | 34 (47.2%)      | 38 (52.8%)     | 0.64    | 30 (42.9%)      | 40 (57.1%)     | 0.15    |
| PD-L1≥1%            | 54 (62.8%)      | 32 (37.2%)           |               | 44 (51.2%)      | 42 (48.8%)     |         | 47 (54.7%)      | 39 (45.3%)     |         |

**Table S3.** Association between expression of exhaustion markers and clinicopathological variables.

| Parameter           | RQI High<br>No. (%) | RQI Low<br>No. (%) | P value |
|---------------------|---------------------|--------------------|---------|
| <b>Age, y</b>       |                     |                    |         |
| <65                 | 41 (56.9%)          | 31 (43.1%)         | 0.19    |
| ≥65                 | 34 (46.0%)          | 40 (54.0%)         |         |
| <b>Sex</b>          |                     |                    |         |
| Male                | 41 (53.3%)          | 36 (46.7%)         | 0.75    |
| Female              | 41 (50.6%)          | 40 (49.4%)         |         |
| <b>Smoker</b>       |                     |                    |         |
| No                  | 19 (63.3%)          | 11 (36.7%)         | 0.16    |
| Yes                 | 62 (48.8%)          | 65 (51.2%)         |         |
| <b>Histology</b>    |                     |                    |         |
| ADC                 | 58 (54.7%)          | 48 (45.3%)         | 0.46    |
| SCC                 | 19 (47.5%)          | 21 (52.5%)         |         |
| <b>Stage</b>        |                     |                    |         |
| I-II                | 15 (46.9%)          | 17 (53.1%)         | 0.56    |
| III-IV              | 66 (53.2%)          | 58 (46.8%)         |         |
| <b>PD-L1 Status</b> |                     |                    |         |
| PD-L1<1%            | 26 (45.6%)          | 31 (54.4%)         | 0.11    |
| PD-L1>1%            | 44 (61.1%)          | 28 (38.9%)         |         |

**Table S4.** Association between RQI and clinicopathological variables.

**Supplementary figures legend**

**Figure S1.** Antibody validation and batch correlation.

**Figure S2.** Cox Continuous Univariate Analysis for TIL density (**A and B**) and for exhaustion markers in the whole cohort (**C and D**) in PD-L1 positive patients (**E and F**) and in negative patients (**G and H**).

**Figure S3.** TLS representation in the cohort and association with number of FOV. Kaplan-Meier survival analysis for TIL density based on PD- L1 status.

**Figure S4.** A RQI for CD4, CD8, CD20, tumor cells, stromal cells, immune cells and integrated. **B-G** Results show the association between density of individual cells and integrated RQI.

**Figure S5.** Survival analysis for RQI of individual cells.
