# Supplementary figures and images for: Role of tumor infiltrating lymphocytes and spatial immune heterogeneity in sensitivity to PD-1 axis blockers in non-small cell lung cancer
Source: PubMed Central journal article supplement — J Immunother Cancer. 2022 Jun 1;10(6):e004440. doi: 10.1136/jitc-2021-004440 (PMC9161072; doi:10.1136/jitc-2021-004440), 2022-06-01

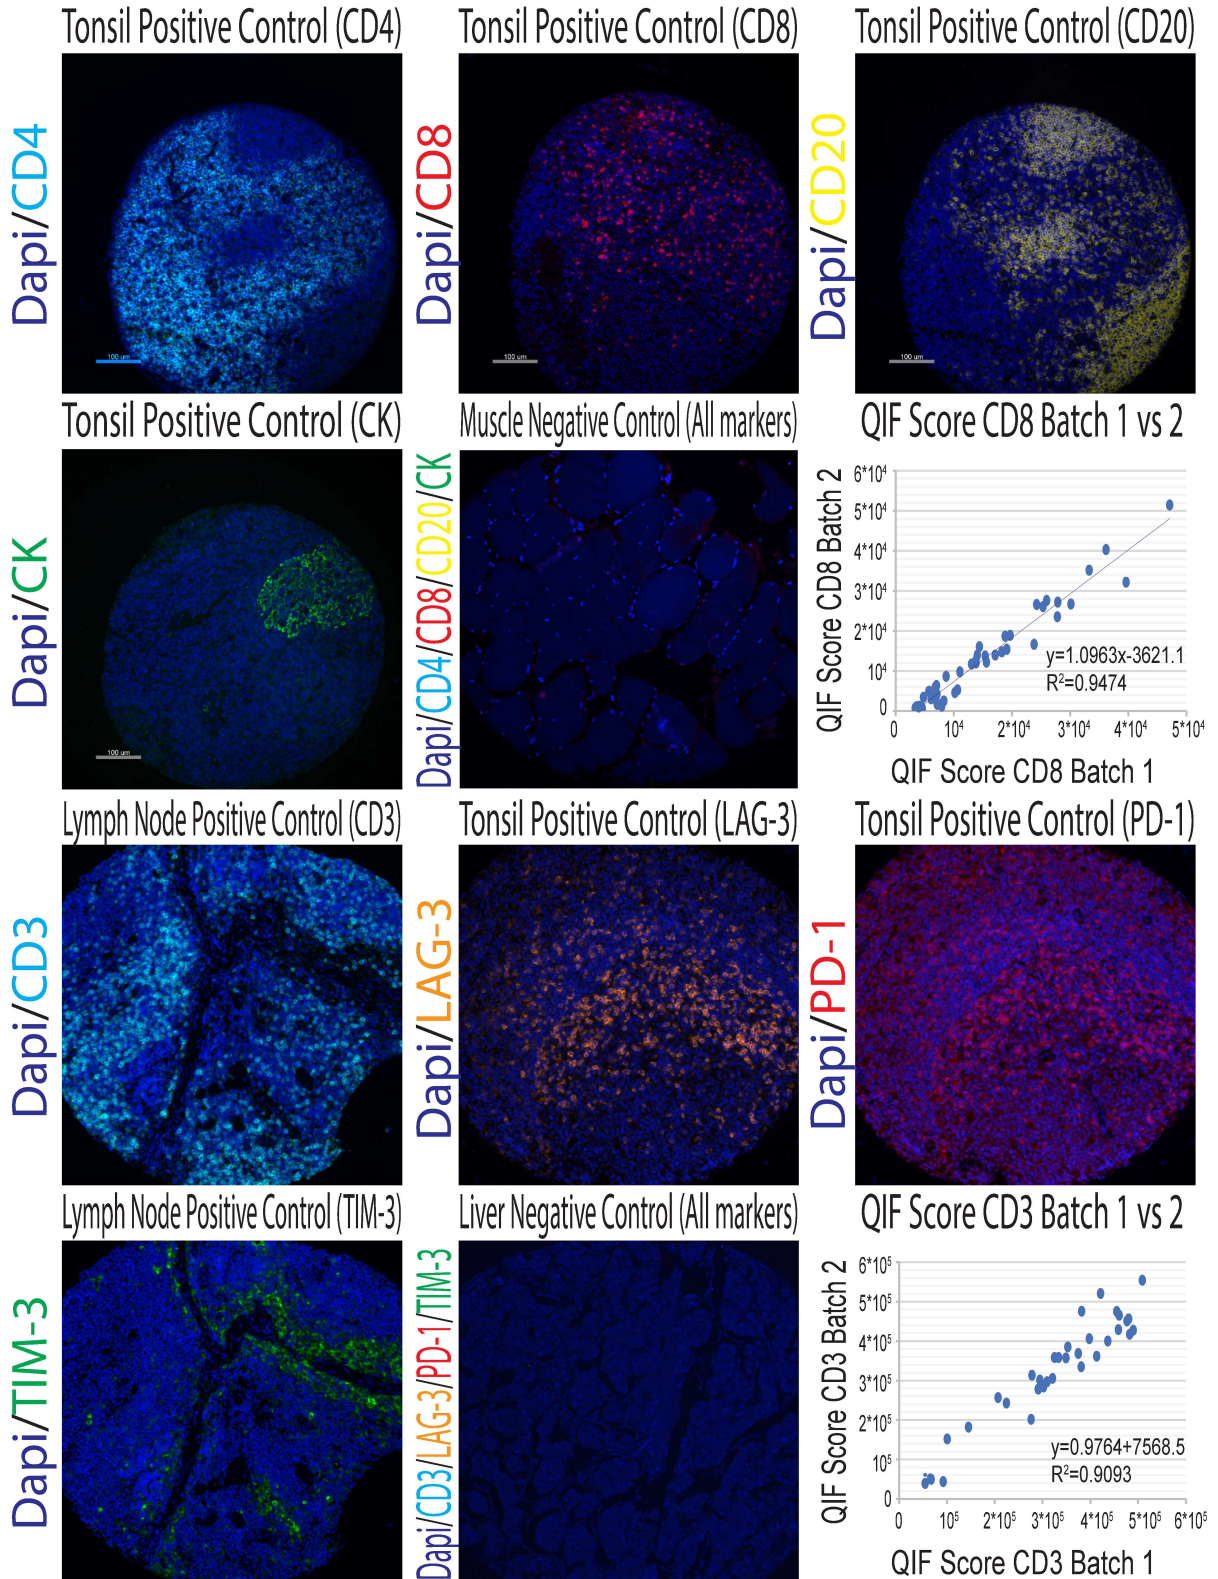

Supplement: jitc-2021-004440supp002.pdf [file jitc-2021-004440supp002.pdf]

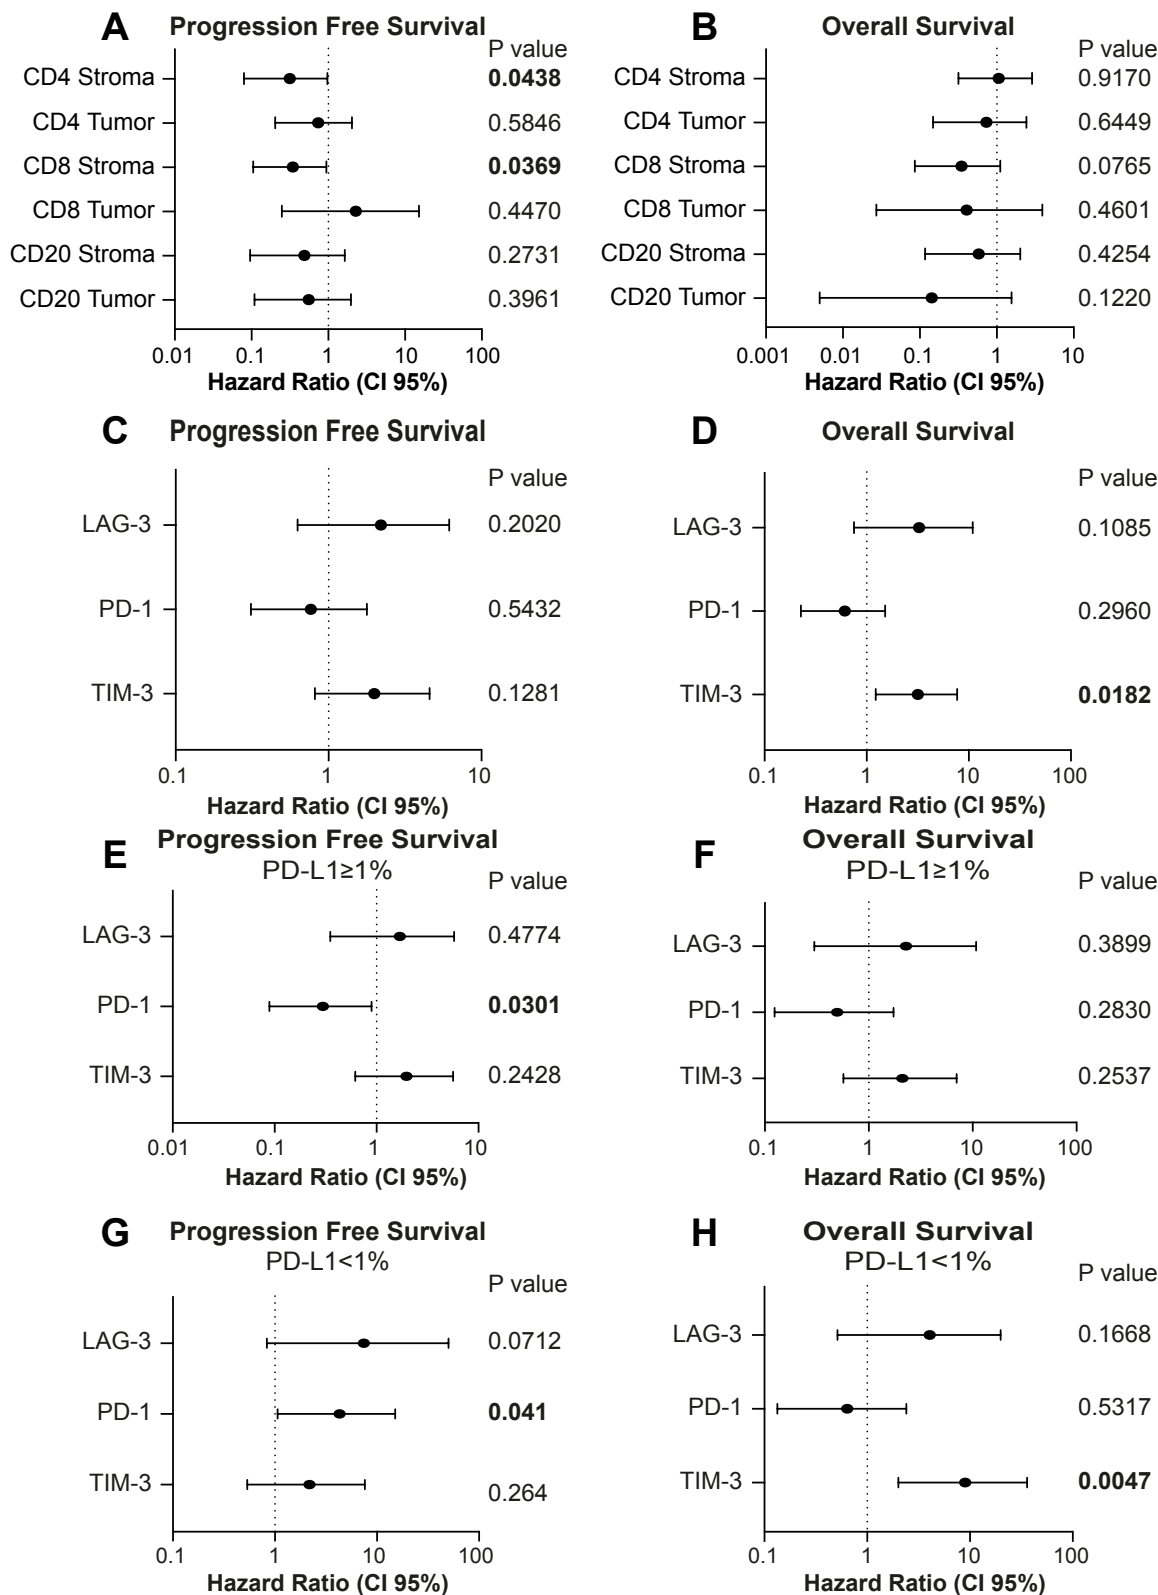

Supplement: jitc-2021-004440supp003.pdf [file jitc-2021-004440supp003.pdf]

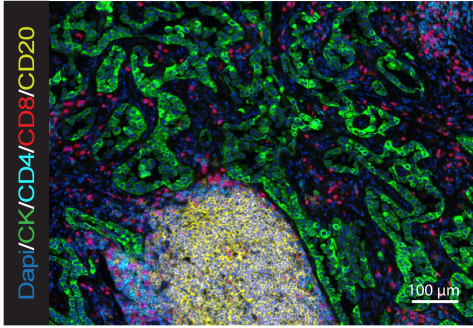

Association TLS and FOV

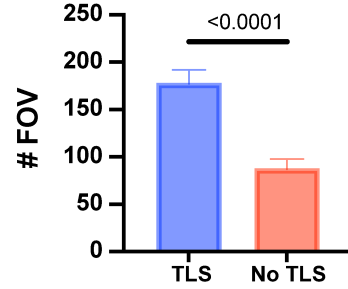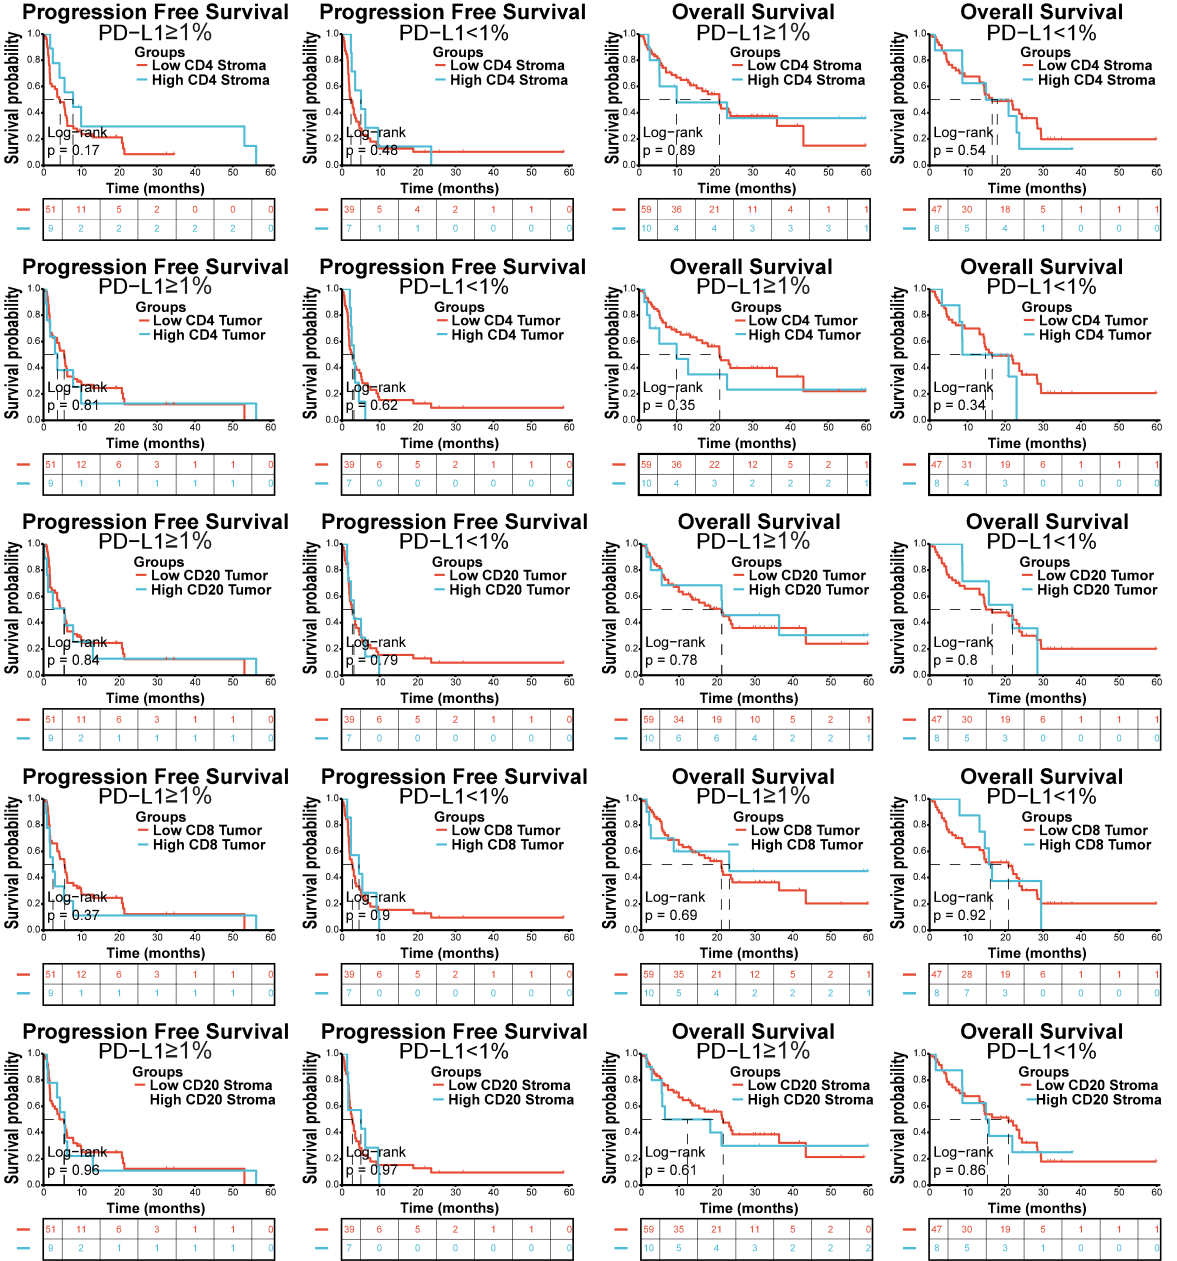

Supplement: jitc-2021-004440supp004.pdf [file jitc-2021-004440supp004.pdf]

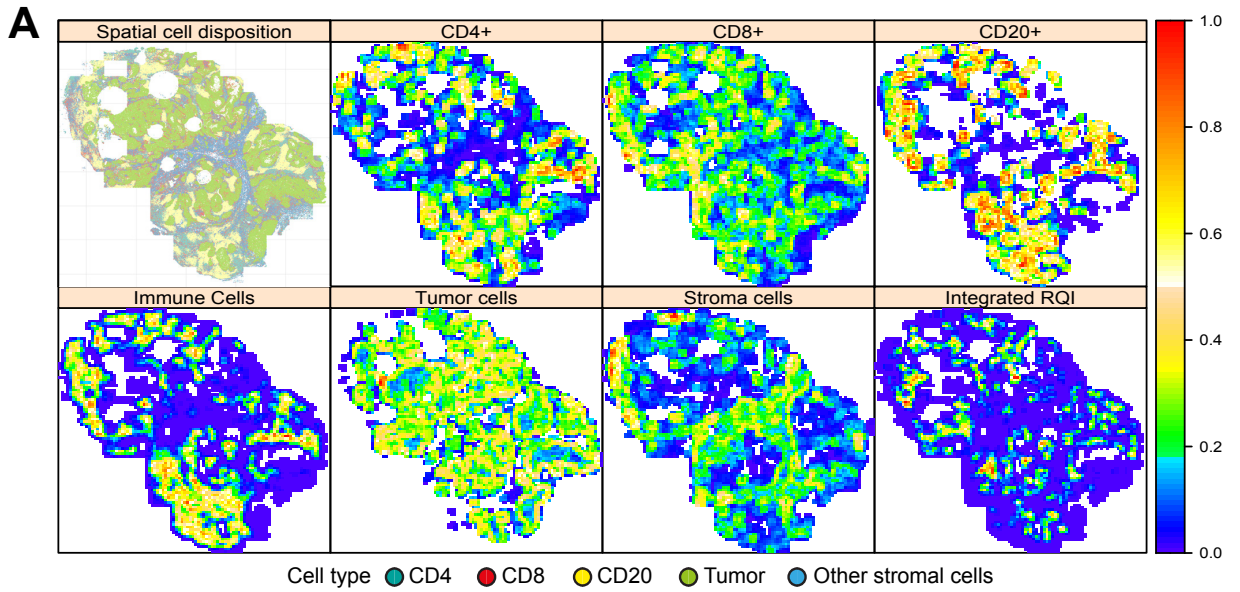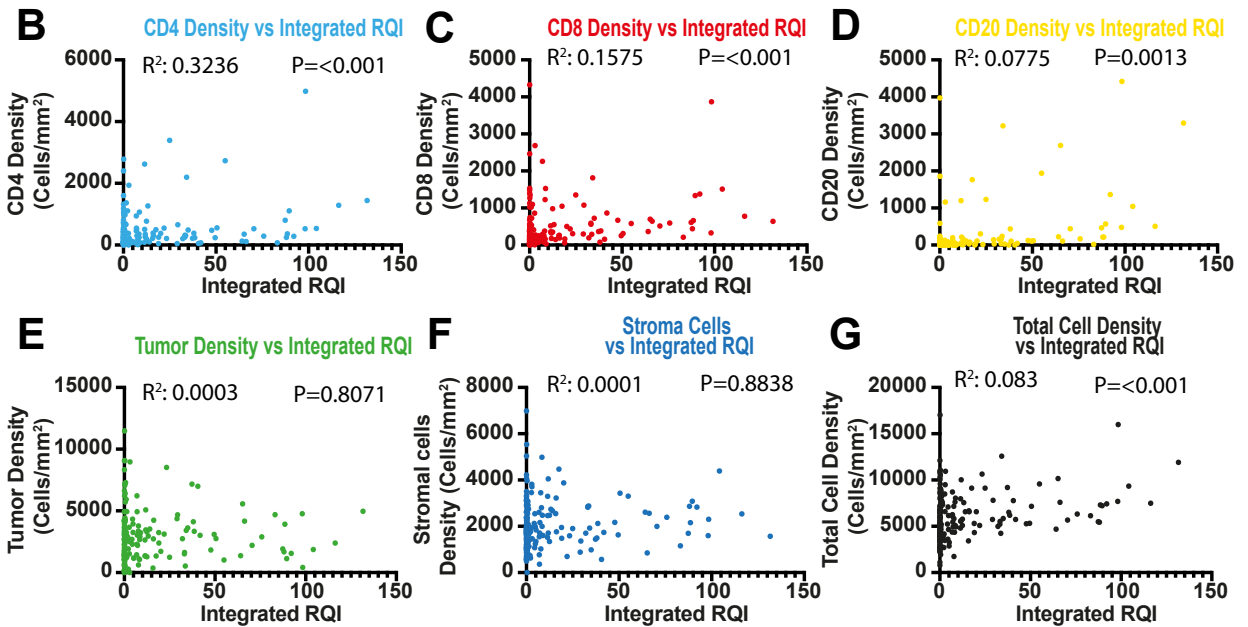

Supplement: jitc-2021-004440supp005.pdf [file jitc-2021-004440supp005.pdf]

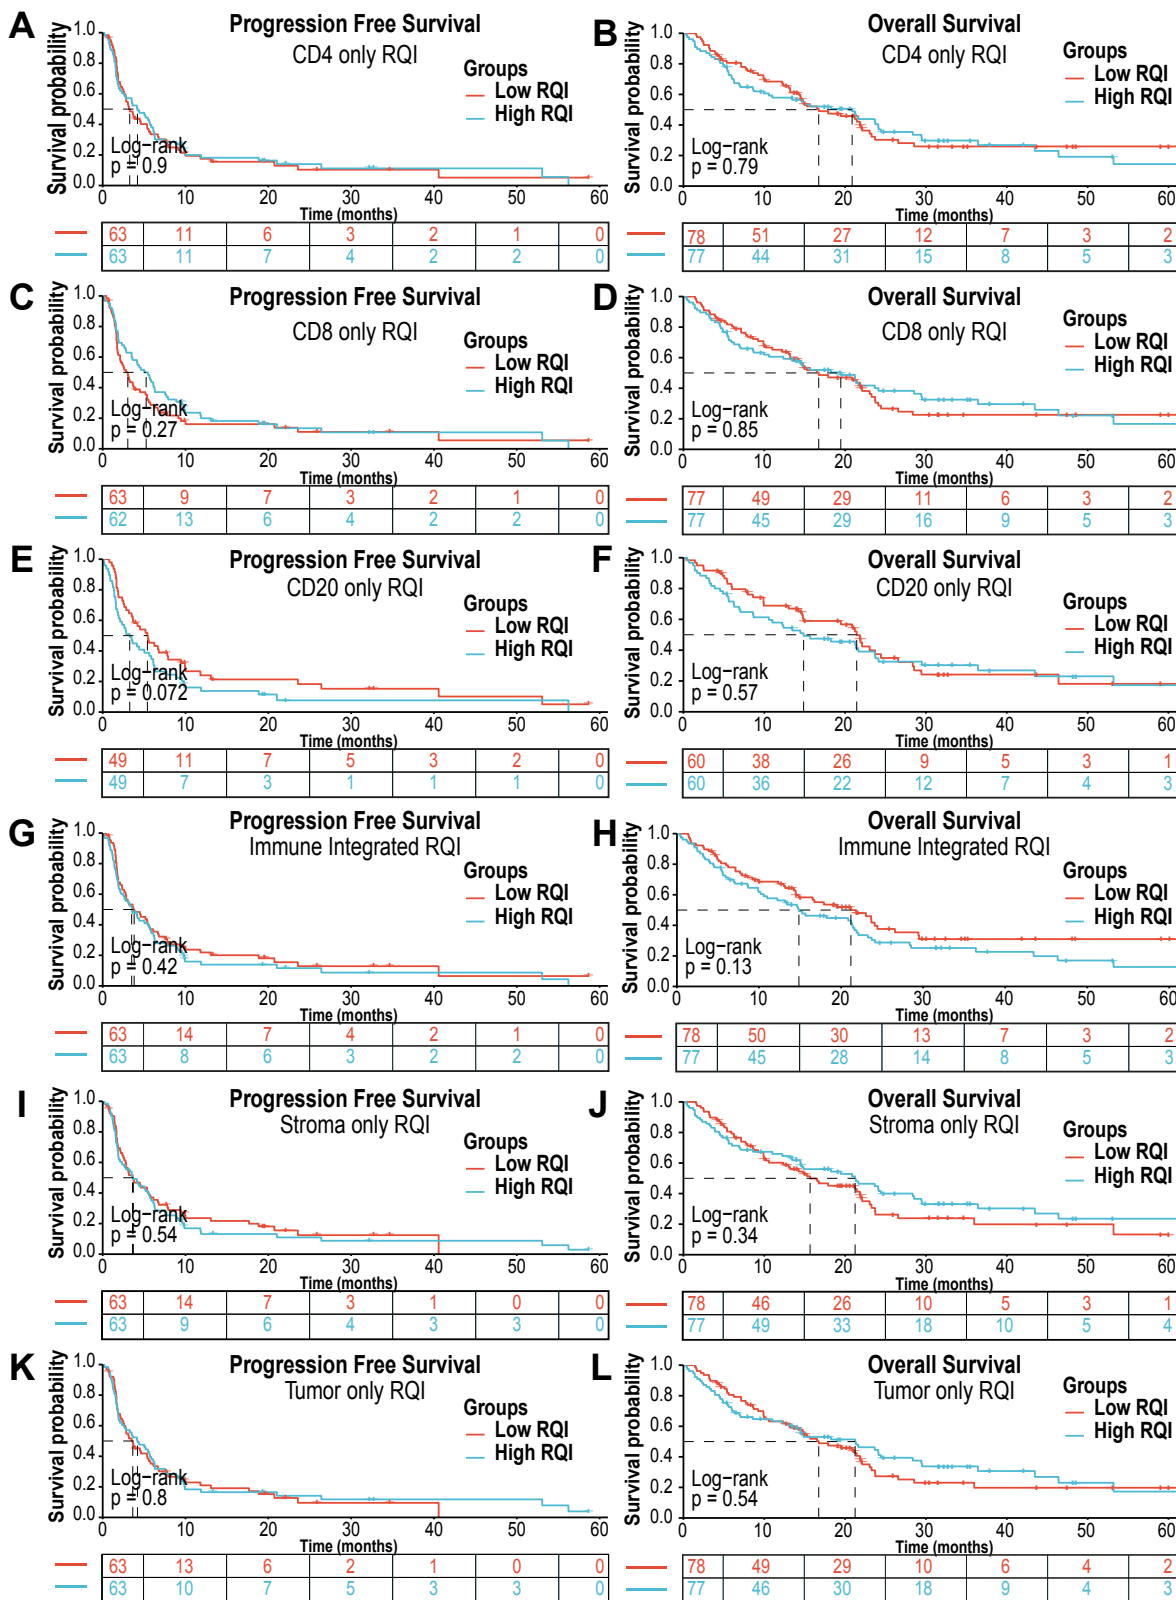

Supplement: jitc-2021-004440supp006.pdf [file jitc-2021-004440supp006.pdf]
